# Supplementary material for: An Integrated Multi-OMICS Approach Highlights Elevated Non-esterified Fatty Acids Impact BeWo Trophoblast Metabolism and Lipid Processing
Source: Preprints.org preprint supplement (doi:10.20944/preprints202306.1022.v1), 2023-06-14
Supplement: Supplementary file 1 [file supplementary]

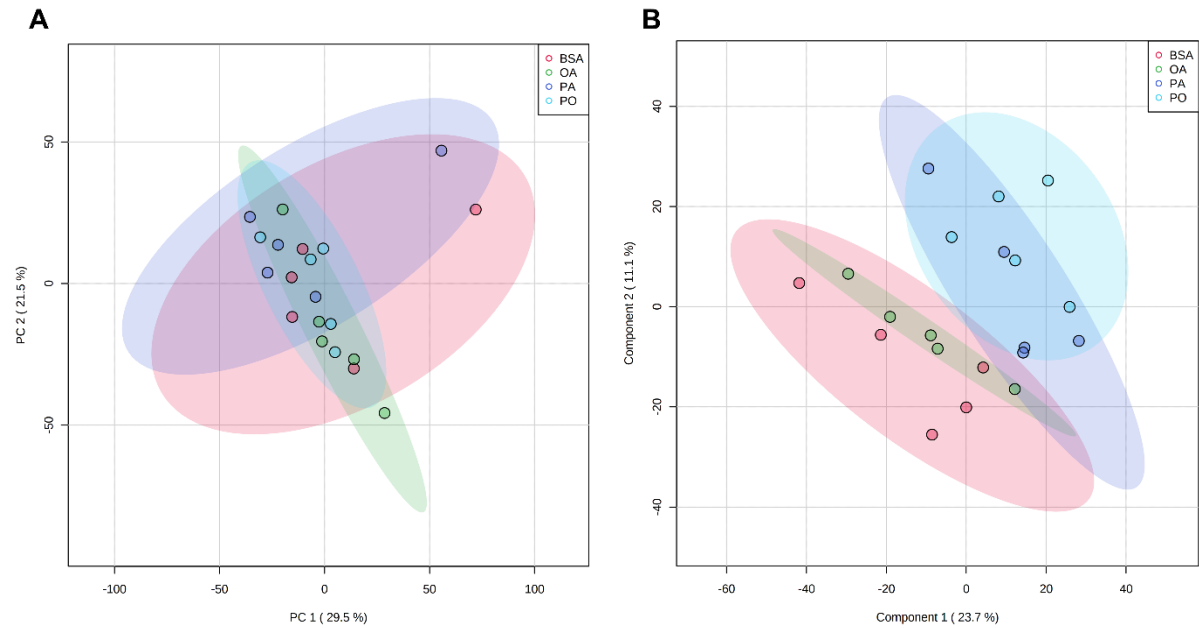

**Supplementary Figure 1. Multivariate visualization of the degree of separation between metabolite profiles in NEFA-treated BeWo CT cells. (A)** Unsupervised principal component analysis (PCA) and **(B)** supervised partial least squares discriminant analysis (PLS-DA) plots were constructed to visualize the degree of difference in metabolite profiles between PA, OA, P/O and BSA-control cultures.

up

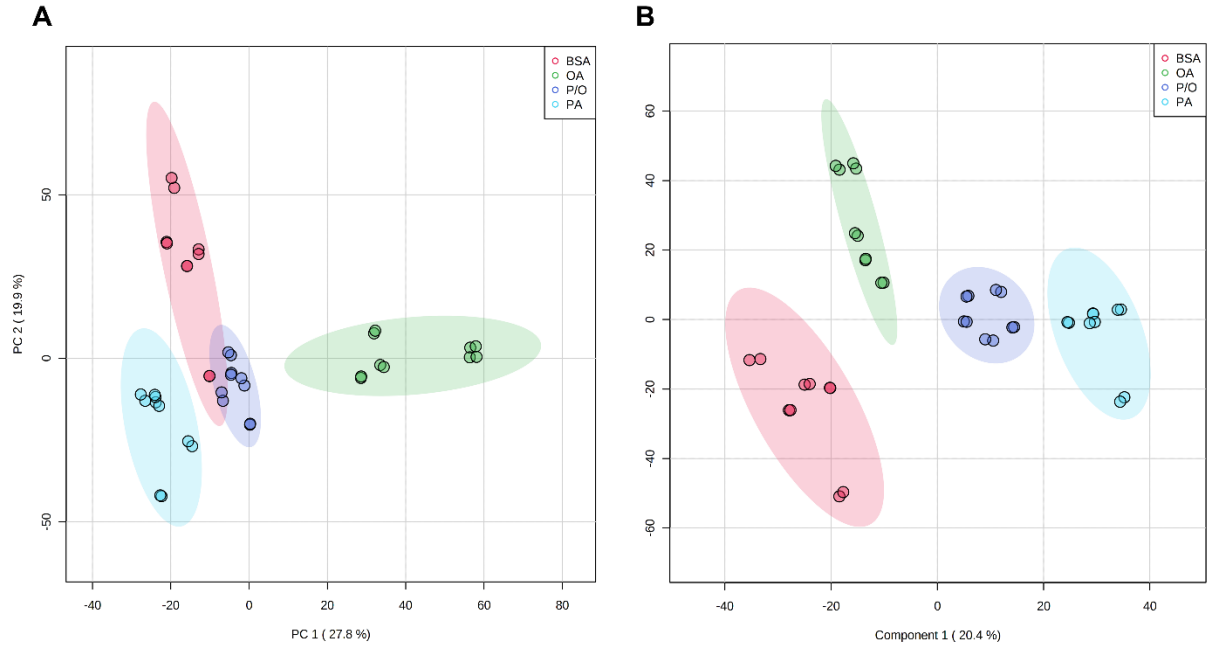

**Supplementary Figure 2. Multivariate visualization of the degree of separation between lipidome profiles in NEFA-treated BeWo CT cells.** (A) Unsupervised principal component analysis (PCA) and (B) supervised partial least squares discriminant analysis (PLS-DA) plots were utilized to visualize the degree of difference in lipidome profiles between PA, OA, P/O and BSA-control cultures.
